# Supplementary material
Source: ML conference proceedings conference paper supplement (https://openaccess.thecvf.com/content/CVPR_2019/html/Huang_Learning_to_Film_CVPR_2019_paper.html)
Supplement: Supplementary file 1 [file Huang_Learning_to_Film_CVPR_2019_supplemental.pdf]

Archive with 1 entries (1 files):
- 1687-supp.mp4
